# Supplementary material for: Controlled drug release characteristics and enhanced antibacterial effect of graphene nanosheets containing gentamicin sulfate
Source: Royal Society of Chemistry journal article supplement (doi:10.1039/c1nr10661a), 2011-01-01
Supplement: c1nr10661a.pdf [file c1nr10661a.pdf]

## Supplementary Information

### Controlled drug release characteristics and enhanced antibacterial effect of graphene nanosheets containing gentamicin sulphate

*Himanshu Pandey,<sup>a,b</sup> Vyom Parashar,<sup>b</sup> Rashmi Parashar,<sup>c</sup> Rajiv Prakash,<sup>d</sup> Promod W Ramteke<sup>a</sup>, and Avinash C Pandey<sup>b</sup>*

<sup>a</sup> Department of Pharmaceutical Science, Faculty of Health, Medical Sciences, Indigenous & Alternative Systems of Medicine, Sam Higginbottom Institute of Agriculture, Technology and Sciences, Allahabad, 211007, India, E-mail: himanshu.nac@gmail.com; Fax: +91 (532)2684394; Tel: +91(532)2684147

<sup>b</sup> Nanotechnology Application Centre, Faculty of Science, University of Allahabad, Allahabad, 211002, India. E-mail: vyomparashar@gmail.com; Fax: +91 (532)2460675; Tel: +91(532)2460675

<sup>c</sup> Department of Biochemistry, Faculty of Science, University of Allahabad, Allahabad, 211002, India

<sup>d</sup> School of Materials Science and Technology, Institute of Technology, Banaras Hindu University, Varanasi, 221005, India

#### **FTIR Analysis of Gentamicin sulphate and Gentamicin loaded MDG nanomatrix**

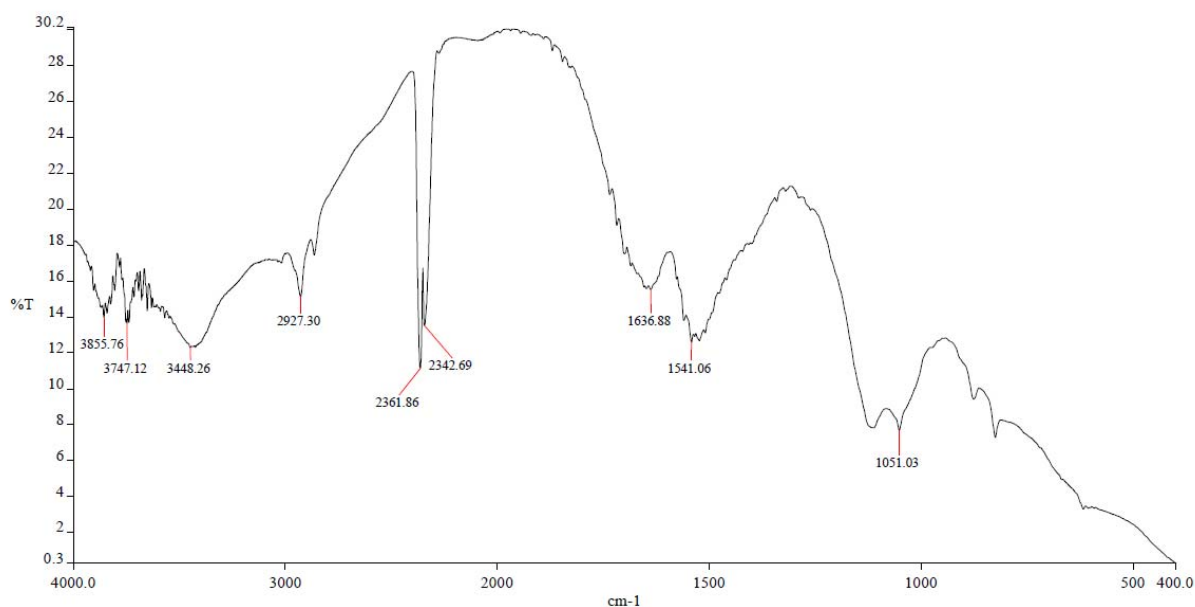

**Fig. S1** FTIR of Gentamicin sulphate

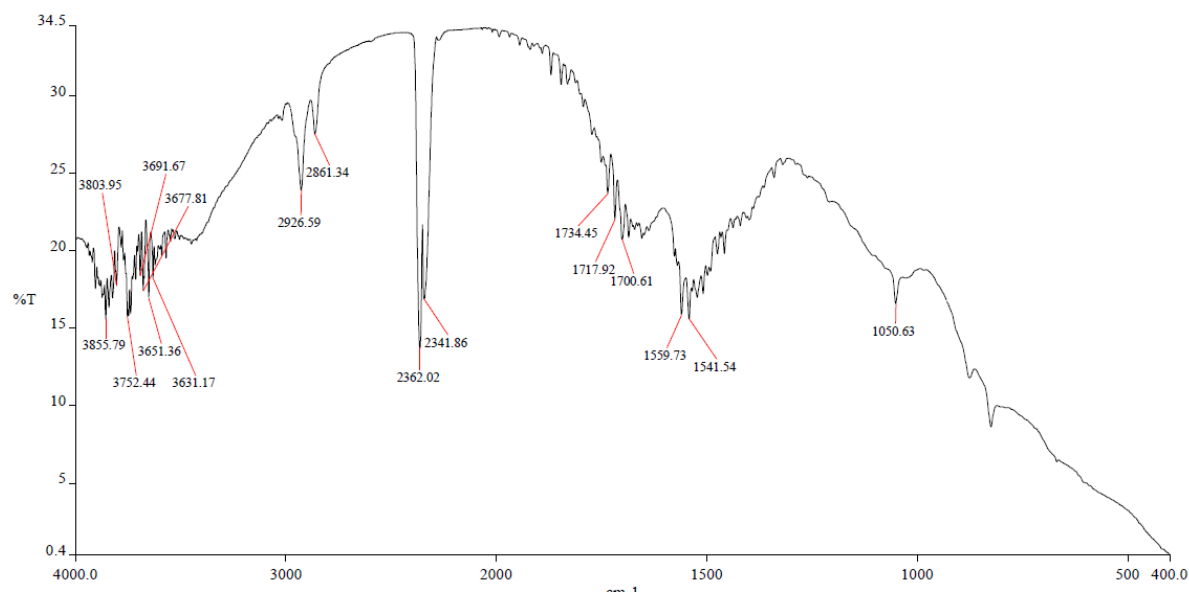

**Fig. S2** FTIR of Gentamicin sulphate loaded MDG nanomatrix

**Protocol for the preparation of buffer solution of different pH viz. 3, 7.4 and 9 respectively<sup>1</sup>**

**Phosphate Buffer Solution pH 3.0**

Mix 0.7 ml of orthophosphoric acid with 100 ml of deionized water and dilute to 900 ml with deionized water. Adjust to pH 3.0 with 10 M sodium hydroxide and add sufficient water to produce 1000 ml.

**Phosphate Buffer Solution pH 7.4**

Add 250 ml of 0.2M potassium dihydrogen orthophosphate to 393.4 ml of 0.1M sodium hydroxide.

**Phosphate Buffer Solution pH 9.0**

Dissolve 1.74 g of potassium dihydrogen orthophosphate in 80 ml of deionized water, adjust the pH, if necessary, with 1M potassium hydroxide and dilute to 100 ml with deionized water.

**Ninhydrin reagent: preparation protocol<sup>1</sup>**

Dissolve 0.2 g of ninhydrin in 4 ml of hot deionized water, add 5 ml of a 0.16% w/v solution of tin (II) chloride, allow standing for 30 minutes, filtering and storing at 2°C to 8°C. Immediately before use, dilute 2.5 ml of the solution with 5 ml of deionized water and 45 ml of propan-2-ol.

## **Reference**

1. British Pharmacopoeia 2007: Electronic version 11.0
